# Supplementary material
Source: publisher figshare collection journal article supplement (https://rs.figshare.com/ndownloader/files/17090144)
Supplement: Supplementary file 1 [file 17090144]

1 **Supplementary material**

2

3 **Title:** Rapid evolution of leaf physiology in an introduced beach daisy.

4 **Authors:** Claire R. Brandenburger, Julia Cooke, William B. Sherwin, Angela T. Moles

5

6

7 **Table S1.** Latitude and longitude for the source population and the four introduced populations;  
8 sample size (with maternal line information in brackets) for each stage of the experiment.

9 **Table S2.** Calculations of mass-based assimilation rates ( $A_{\text{mass}}$ ) by using area-based assimilation  
10 rates ( $A_{\text{area}}$ ) multiplied by the mean specific leaf area (SLA) values from the whole group of  
11 experimental plants.

12 **Table S3.** A contrast for each trait between the South African source population and the four  
13 Australian introduced populations using one-way analyses of variance (ANOVAs) with a planned  
14 contrast.

15 **Table S4.** A contrast for each trait among only the four introduced populations in Australia using  
16 one-way analyses of variance (ANOVAs).

17 **Fig. S1.** Stomatal ratios (stomata count on upper surface/stomata count on lower surface) in source  
18 and introduced plants as mean values (+/- standard error).

19 **Fig. S2.** Graphs showing distribution of data within each population for all traits in Figures 1-3.

20

21 **Appendix S1.** Raw data.

22 **Table S1.** Latitude and longitude for the most likely South African source population and the four  
 23 Australian introduced populations; sample size (with maternal line information in brackets) for each  
 24 stage of the experiment.

|                                                                                                      | Source population      | Introduced populations |                  |              |                 |
|------------------------------------------------------------------------------------------------------|------------------------|------------------------|------------------|--------------|-----------------|
|                                                                                                      | Arniston, South Africa | Treachery beach, Aus   | Wairo beach, Aus | Narooma, Aus | Mallacoota, Aus |
| Latitude                                                                                             | -34.6579               | -32.4468               | -35.4423         | -36.2238     | -37.5688        |
| Longitude                                                                                            | 20.2329                | 152.5202               | 150.4089         | 150.1401     | 149.7621        |
| Number of individuals sampled at each beach                                                          | 46                     | 17                     | 38               | 24           | 45              |
| Number of parent plants planted in the glasshouse                                                    | 143                    | 41                     | 68               | 39           | 70              |
| Number of parent plants producing seeds                                                              | 36                     | 20                     | 53               | 26           | 51              |
| Number of resulting experimental plants (number of distinct maternal lines)                          | 123 (20)               | 40 (13)                | 68 (31)          | 70 (12)      | 39 (33)         |
| Plants randomly selected for photosynthetic measurements (number of distinct maternal lines)         | 11 (9)                 | 6 (6)                  | 9 (9)            | 8 (8)        | 10 (10)         |
| Subset of plants randomly selected to run CO <sub>2</sub> curves (number of distinct maternal lines) | 8 (8)                  | 5 (5)                  | 6 (6)            | 5 (5)        | 6 (6)           |

26 **Table S2.** Calculations of mass-based assimilation rates ( $A_{\text{mass}}$ ) by using area-based assimilation  
 27 rates ( $A_{\text{area}}$ ) multiplied by the mean specific leaf area (SLA) values from the whole group of  
 28 experimental plants [1]. The p-values for each trait are from a planned contrast between the most  
 29 likely South African source population and the four Australian introduced populations following a  
 30 one-way analysis of variance.

|                              | $A_{\text{area}}$<br>( $\mu\text{mol m}^{-2} \text{s}^{-1}$ ) | Mean SLA, n=340<br>( $\text{m}^2 \text{kg}^{-1}$ ) | $A_{\text{mass}}$<br>( $\text{nmol g}^{-1} \text{s}^{-1}$ ) |
|------------------------------|---------------------------------------------------------------|----------------------------------------------------|-------------------------------------------------------------|
| South African source plants  | 29.71                                                         | 19.04                                              | 565.8                                                       |
| Australian introduced plants | 25.96                                                         | 18.50                                              | 480.2                                                       |
| p-value                      | p=0.006                                                       | p=0.638                                            | p=0.001                                                     |

31

32 **Table S3.** A contrast for each trait between the South African population and the four Australian  
33 introduced populations using one-way analyses of variance (ANOVAs) with a planned contrast. Data  
34 shown are the t statistic (t) and p-values. The adjusted p-values and resulting significance outcomes  
35 are those obtained after calculating a Holm-Bonferroni sequential correction to account for multiple  
36 tests [2, 3]. Only one trait (hair density on upper leaf surface, italicised) changed its significance.

| Trait                                                   | t      | p-value | Adjusted p-values | Significance outcome |
|---------------------------------------------------------|--------|---------|-------------------|----------------------|
| Maximum rate of carboxylation ( $V_{\text{cmax}}$ )     | 19.265 | 0.001   | 0.012             | SIG                  |
| Hair density on lower leaf surface                      | 7.809  | 0.001   | 0.012             | SIG                  |
| Stomatal conductance ( $g_s$ )                          | -5.298 | 0.001   | 0.012             | SIG                  |
| Water-use efficiency                                    | 3.975  | 0.001   | 0.012             | SIG                  |
| Intercellular $\text{CO}_2$ ( $C_i$ )                   | -3.396 | 0.002   | 0.016             | SIG                  |
| Photosynthetic nitrogen-use efficiency                  | -3.369 | 0.002   | 0.016             | SIG                  |
| $\text{CO}_2$ assimilation rate ( $A_{\text{area}}$ )   | -2.918 | 0.006   | 0.036             | SIG                  |
| <i>Hair density on upper leaf surface</i>               | -2.359 | 0.023   | 0.115             | NON SIG              |
| Nitrogen per leaf area                                  | 0.888  | 0.382   | 1.000             | NON SIG              |
| Stomatal density on upper leaf surface                  | 0.810  | 0.423   | 1.000             | NON SIG              |
| Stomatal density on lower leaf surface                  | 0.708  | 0.483   | 1.000             | NON SIG              |
| Maximum rate of electron transport ( $J_{\text{max}}$ ) | -0.065 | 0.948   | 1.000             | NON SIG              |

38 **Table S4.** A contrast for each trait among only the four introduced populations in Australia using  
39 one-way analyses of variance (ANOVAs). Data shown are the mean-square (MS), the *F* statistic (*F*)  
40 and p-values. The adjusted p-values and resulting significance outcomes are those obtained after  
41 computing a Holm-Bonferroni sequential correction to account for multiple tests [2, 3]. Only one  
42 trait (stomatal density on bottom of leaf, italicised) changed its significance.

| Trait                                                   | MS    | F     | p-value | Adjusted p-values | Significance outcome |
|---------------------------------------------------------|-------|-------|---------|-------------------|----------------------|
| <i>Stomatal density on bottom of leaf</i>               | 3338  | 4.207 | 0.013   | 0.156             | NON SIG              |
| Hair density on top of leaf                             | 192.4 | 2.581 | 0.072   | 0.792             | NON SIG              |
| Photosynthetic nitrogen-use efficiency                  | 10.52 | 1.883 | 0.171   | 1.000             | NON SIG              |
| Nitrogen per leaf area                                  | 0.284 | 1.689 | 0.205   | 1.000             | NON SIG              |
| Stomatal density on top of leaf                         | 2952  | 1.554 | 0.221   | 1.000             | NON SIG              |
| Maximum rate of carboxylation ( $V_{\text{cmax}}$ )     | 119.0 | 0.528 | 0.669   | 1.000             | NON SIG              |
| Intercellular CO <sub>2</sub> ( $C_i$ )                 | 123.3 | 0.489 | 0.692   | 1.000             | NON SIG              |
| Maximum rate of electron transport ( $J_{\text{max}}$ ) | 220.6 | 0.446 | 0.723   | 1.000             | NON SIG              |
| Hair density on bottom of leaf                          | 194.0 | 0.434 | 0.731   | 1.000             | NON SIG              |
| Water-use efficiency                                    | 42.53 | 0.336 | 0.800   | 1.000             | NON SIG              |
| CO <sub>2</sub> assimilation rate ( $A_{\text{area}}$ ) | 4.574 | 0.312 | 0.816   | 1.000             | NON SIG              |
| Stomatal conductance ( $g_s$ )                          | 0.015 | 0.237 | 0.870   | 1.000             | NON SIG              |

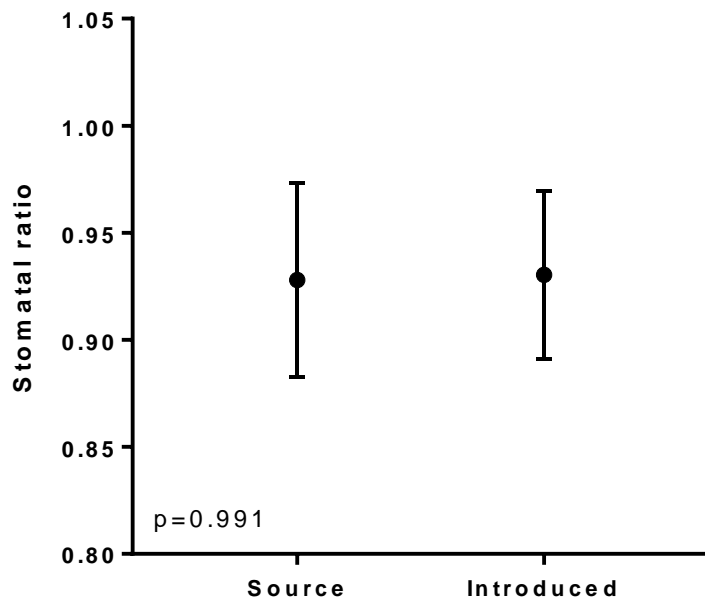

44

45 **Fig. S1.** Stomatal ratios (stomata count on upper surface/stomata count on lower surface) in source  
 46 and introduced plants as mean values (+/- standard error). The p-value is from a planned contrast  
 47 between the most likely South African source population and the four Australian introduced  
 48 populations following a one-way analysis of variance (ANOVA). This type of analysis takes into  
 49 account the defined comparison of plants from one South African population with plants from four  
 50 Australian populations. The y-axis has been truncated.

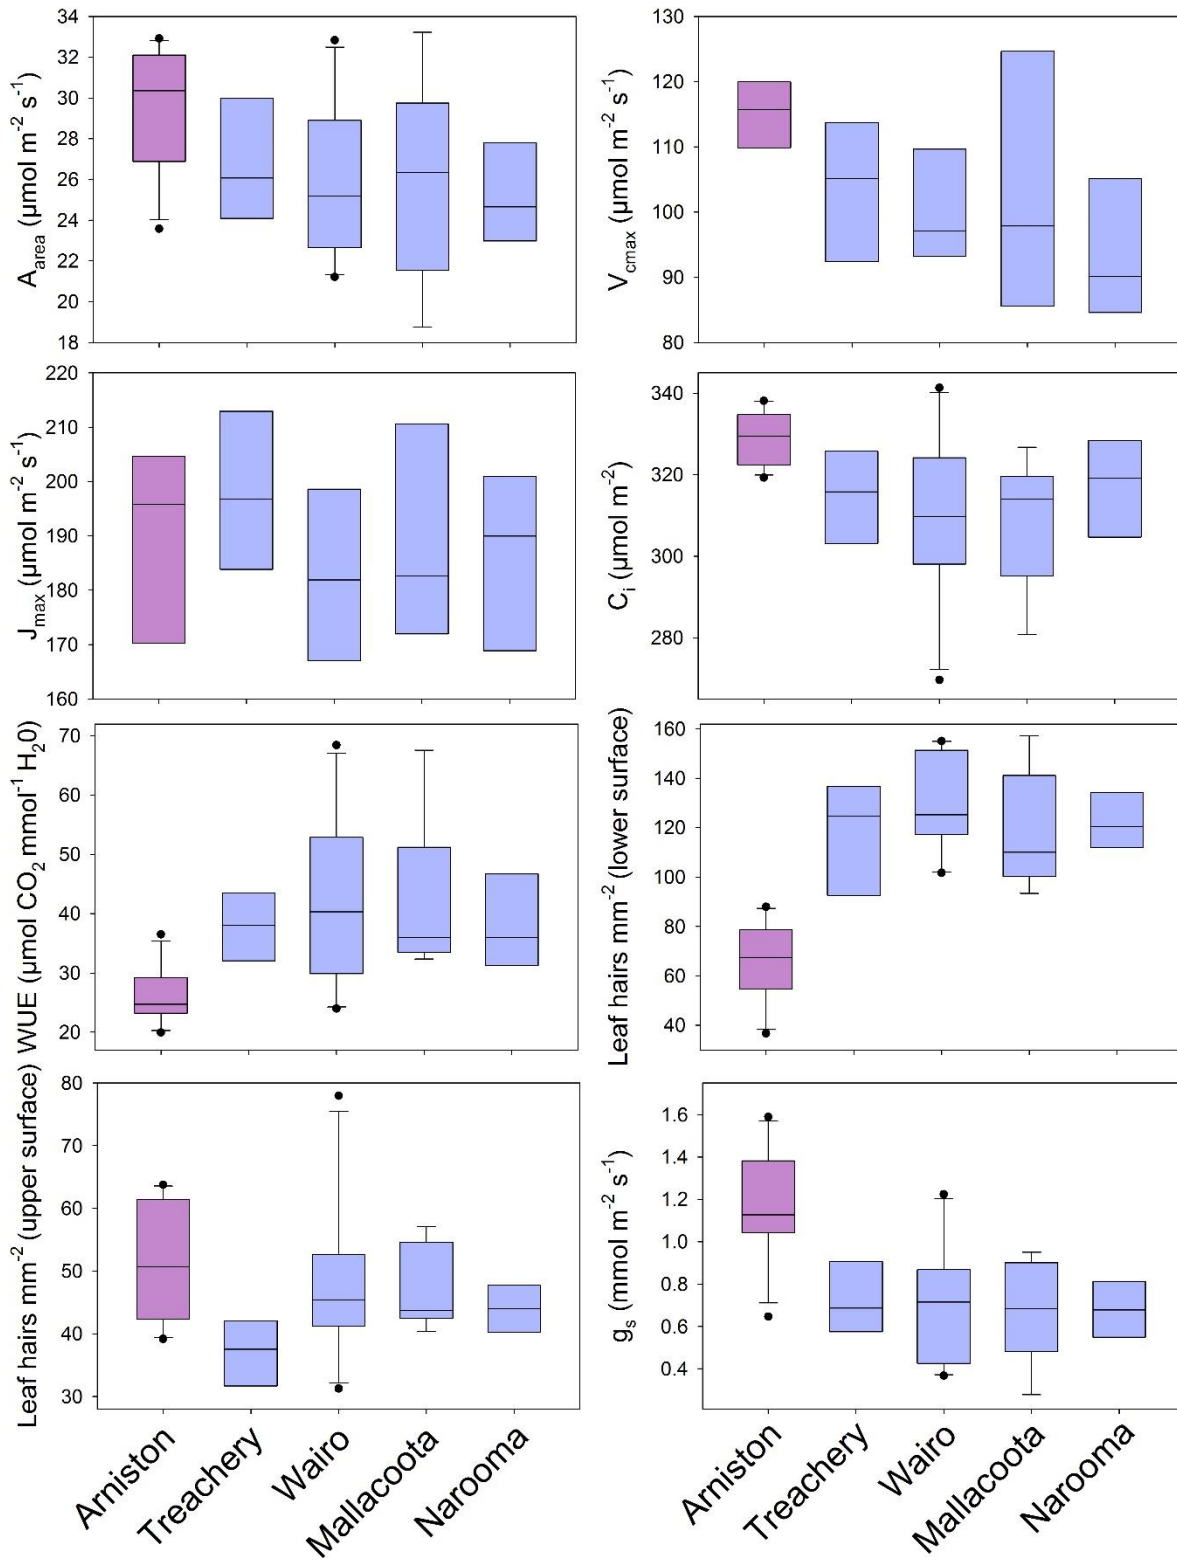

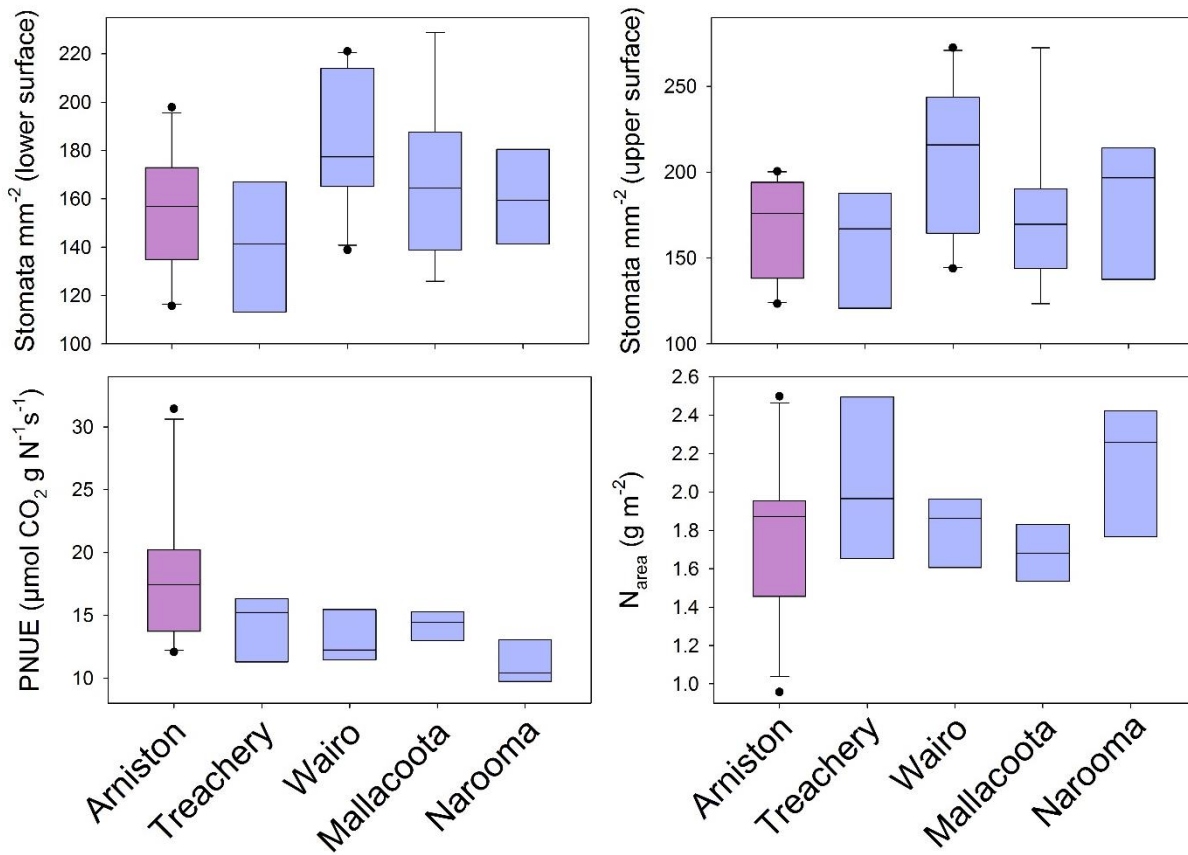

52

53 **Fig. S2.** Boxplots showing the distribution of trait data within each of the five populations, for each  
54 of the traits presented in Figures 1-3. The South African population (Arniston) is shown in pink,  
55 while the four Australian populations (Treachery, Wairo, Mallacoota and Narooma) are in blue.  
56 None of the differences between Australian populations are significant (Table S4). Boxes span from  
57 the 25<sup>th</sup> to 75<sup>th</sup> percentile with the median marked as a horizontal line. Whiskers span from the 5<sup>th</sup> to  
58 95<sup>th</sup> percentiles, and outliers are shown as dots. The y-axes have been truncated.



59   **References**

- 60   [1] Brandenburger, C.R., Sherwin, W.B., Creer, S.M., Buitenwerf, R., Poore, A.G., Frankham, R., Finnerty,  
61   P.B. & Moles, A.T. 2019 Rapid reshaping: the evolution of morphological changes in an introduced beach  
62   daisy. *Proceedings of the Royal Society B*. (doi:10.1098/rspb.2018.1713).  
63   [2] Holm, S. 1979 A simple sequentially rejective multiple test procedure. *Scand J Stat* **6**, 65-70.  
64   [3] Gaetano, J. 2013 Holm-Bonferroni sequential correction: an EXCEL calculator (1.1) Microsoft Excel  
65   workbook.
